# Supplementary material for: Highly sensitive dual-sensing of blood glucose and UV light enabled by complexing biazopyridiniums with quantum dots
Source: Royal Society of Chemistry journal article supplement (doi:10.1039/d5tc04324g), 2026-01-01
Supplement: d5tc04324g1.pdf [file d5tc04324g1.pdf]

## Supporting Information

### Highly Sensitive Dual-Sensing of Blood Glucose and UV light Enabled by Complexing Biazopyridiniums with Quantum Dots

Ge Sun<sup>a</sup>, Yinjie Chen<sup>\*a</sup> and Haifeng Yu<sup>\*b</sup>

<sup>a</sup> Department Beijing Engineering Research Centre of Printed Electronics, Beijing Institute of Graphic Communication, Beijing 102600, China.

<sup>b</sup> School of Materials Science and Engineering, and Key Laboratory of Polymer Chemistry and Physics of Ministry of Education, Peking University, Beijing 100871, China.

\*Corresponding author. E-mail: chenyinjie@bigc.edu.cn (Y.J.C.); yuhaifeng@pku.edu.cn (H.F.Y.).

Keywords: Bisazopyridine borates, Fluorescent probes, Glucose detection, UV detection.

#### Contents

|           |                                                                                                                                                                                                                  |
|-----------|------------------------------------------------------------------------------------------------------------------------------------------------------------------------------------------------------------------|
| Scheme S1 | Synthesis of the Bisazopyridine borates (8DAPB)                                                                                                                                                                  |
| S1        | <sup>1</sup> H NMR spectra of compound 8DAP in CDCl <sub>3</sub>                                                                                                                                                 |
| S2        | <sup>1</sup> H NMR spectra of compound 8DAPB in CDCl <sub>3</sub>                                                                                                                                                |
| S3        | FTIR spectra of 8DAPB measured in KBr pellets                                                                                                                                                                    |
| S4        | Thermal properties of 8DAPB & 8DAP                                                                                                                                                                               |
| S5        | FTIR spectra of CdSe/ZnS QDs                                                                                                                                                                                     |
| S6        | Emission spectra of CdSe/ZnS QDs with excitation at different wavelengths                                                                                                                                        |
| S7        | Characterisation of the QDs.                                                                                                                                                                                     |
| S8        | UV-vis absorption spectra of 8DAP and 8DAPB in Ethyl alcohol                                                                                                                                                     |
| S9        | The plots of trans-Dazo content versus time after UV irradiation & after visible-light irradiation                                                                                                               |
| S10       | Fluorescence efficiency plots for the QDs and 8DAPB@QDs                                                                                                                                                          |
| S11       | Plots of the QDs quenched by various amounts of 8DAPB in ethanol/water mixtures (65% v/v)                                                                                                                        |
| S12       | Plots of the 8DAPB@QDs recovery by various amounts of glucose in ethanol/water mixtures (65% v/v)                                                                                                                |
| S13       | ANOVA plot of relative fluorescence recovery (F/F <sub>0</sub> ) of 8DAPB@QDs at different glucose concentrations                                                                                                |
| S14       | UPS of QDs alone, 8DAPB@QDs, and 8DAPB@QDs +glucose, respectively                                                                                                                                                |
| S15       | Effect of different concentrations of glucose on the FL(F/F <sub>0</sub> ) of QDs without 8DAPB                                                                                                                  |
| S16       | Effect of common species (e.g., Glucose, D-Malic acid, L-Malic acid, Uric acid, Ga <sup>2+</sup> , Na <sup>+</sup> , Fe <sup>3+</sup> , Fructose) on the Fluorescence Intensity (F/F <sub>0</sub> ) of 8DAPB@QDs |
| S17       | UV response curves obtained from the 8DAPB@QDs (5,10 μm) system under different UV irradiation durations                                                                                                         |
| S18       | Plots of the 8DAPB@QDs recovery by various irradiances of UV in ethanol/water mixtures (65% v/v)                                                                                                                 |
| S19       | Effect of different irradiances of UV on the FL(F/F <sub>0</sub> ) of QDs without 8DAPB                                                                                                                          |

|            |                                                                                                 |
|------------|-------------------------------------------------------------------------------------------------|
| S20        | Changes in the absorption spectrum of 8DAPB upon irradiation with 365 nm light in Ethyl alcohol |
| S21        | Time-resolved fluorescence decay curves for the pure QDs, 8DAPB@QDs, and UV-treated 8DAPB@QDs   |
| S22        | Research on Sensor Independence                                                                 |
| Table S1   | Fluorescence quantum yield of QD and 8DAPB@QDs                                                  |
| Table S2   | Time-resolved fluorescence decay                                                                |
| Formula S1 | Standard deviation                                                                              |

---

### Preparation of the Bisazopyridine borates (8DAPB).

The synthesis route of the Bisazopyridine borates (8DAPB) is shown in Scheme S1.

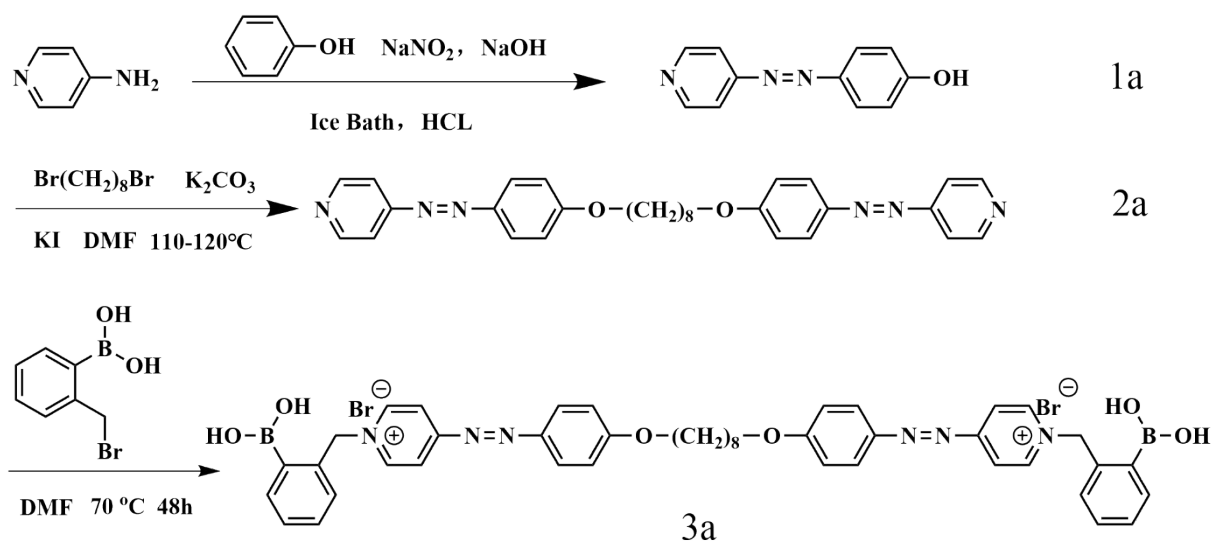

**Scheme S1.** Synthesis of the Bisazopyridine borates (8DAPB).

**Compound 1a.** A 10 w/w% NaOH aqueous solution (20 mL) comprising sodium nitrite (4.00 g, 58 mmol) and phenol (5.00 g, 53 mmol) was prepared and cooled to 0 °C. Subsequently, It was then added dropwise to another aqueous solution of HCl 45 mL (25 mL 11 N HCl and 20 mL deionised water) and 4-aminopyridine (6.00 g, 64 mmol). The reaction mixture was stirred in an ice bath (0 °C). Subsequently, the pH of the reaction mixture was adjusted to pH 6-7 by the addition of a 10 w/w% NaOH aqueous solution. A yellow precipitate was collected by filtration. The crude product was washed with water. After drying under vacuum for 24 h, the resulting bright yellow solid was obtained: yield 3.77 g (35.74%)

**Compound 2a (8DAP).** 1,8-Dibromooctane (0.6800 g, 2.5 mmol), K<sub>2</sub>CO<sub>3</sub> (0.7700 g, 5.57 mmol), KI (a catalytic amount) and 4-(4-hydroxyphenylazo) pyridine (0.9950 g, 5 mmol) were dissolved in N, N-dimethylformamide (DMF, 40 mL). The mixture was heated in an oil bath to 114–115 °C. After 5 hours, the mixture was poured into water (200 mL) and a purple precipitate was collected by filtration. The crude product was purified by silica gel column chromatography using a mixture of ethyl acetate and petroleum ether as the eluent. The solvent was removed using a rotary evaporator and the product was recrystallised from ethanol. The resulting bright yellow solid was obtained in 4.2% yield. The <sup>1</sup>H NMR spectrum of the compound was recorded for a 5% (w/v) solution in CDCl<sub>3</sub>, as shown in Figure S1.

<sup>1</sup>H NMR (600 MHz, Chloroform-d) δ 8.77 (d, J = 6.2 Hz, 4H), 7.95 (d, J = 8.9 Hz, 4H), 7.67 (d, J = 6.3 Hz, 4H), 7.02 (d, J = 8.9 Hz, 4H), 4.07 (t, J = 6.5 Hz, 4H), 1.93-1.76 (m, 4H), 1.56-1.37 (m, 8H)

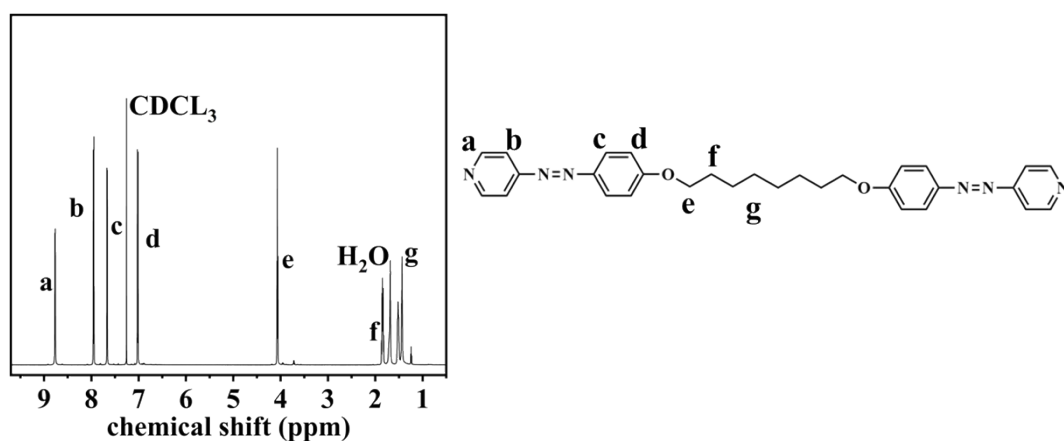

**Figure S1.** The <sup>1</sup>H NMR spectrum of compound 2a (8DAP) recorded in CDCl<sub>3</sub>.

**Bisazopyridine borates (8DAPB).** The target compound 8DAPB was synthesised according to the following procedure: diazopyridine compound 2a (8DAP) (1.6 mmol) and 2-(bromomethyl) phenylboronic acid (4.1 mmol) were dissolved in N, N-dimethylformamide (DMF, 20 mL). The reaction mixture was heated in an oil bath at 70 °C for 48 h. Water was then added to precipitate the product, yielding an auburn solid. The  $^1\text{H}$  NMR spectrum of the product (3a) was recorded for a 5 % (w/v) solution in  $\text{CDCl}_3$ , as shown in Figure S2.

Yield: 30.5%. The  $^1\text{H}$  NMR spectrum of 8DAPB was obtained by using a 5 % (w/v)  $\text{CDCl}_3$  solution of the compound.  $^1\text{H}$  NMR (500 MHz,  $\text{CDCl}_3$ )  $\delta$  9.16-9.05 (m, 4H), 8.98 (d,  $J$  = 6.7 Hz, 4H), 8.16-8.09 (m, 4H), 8.06-7.97 (m, 4H), 7.53-7.43 (m, 4H), 7.09-7.01 (m, 4H), 6.10 (s, 4H), 4.11 (t,  $J$  = 6.4 Hz, 4H), 1.85 (m, 4H), 1.38 (m, 8H).

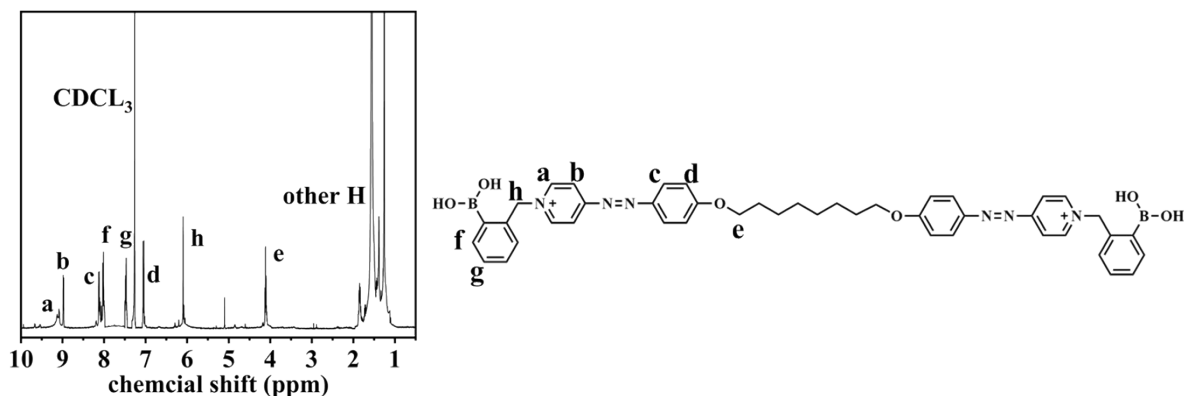

**Figure S2.** The  $^1\text{H}$  NMR spectrum of compound 3a (8DAPB) recorded in  $\text{CDCl}_3$ .

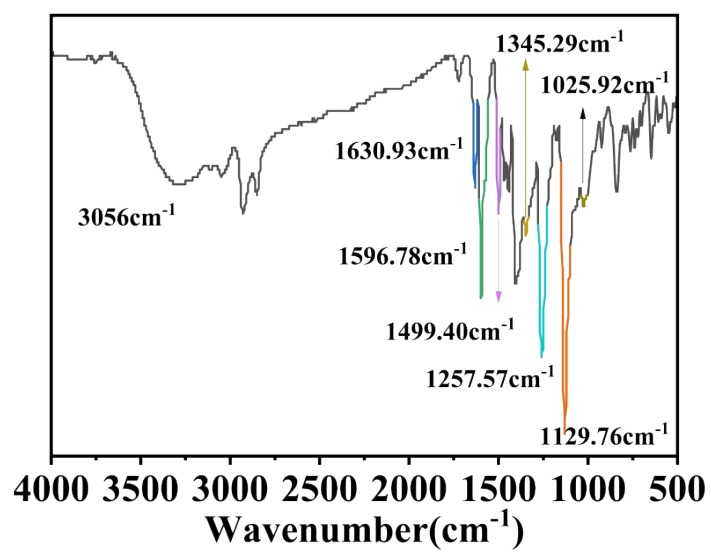

**Figure S3.** FTIR spectra of 8DAPB measured in KBr pellets.

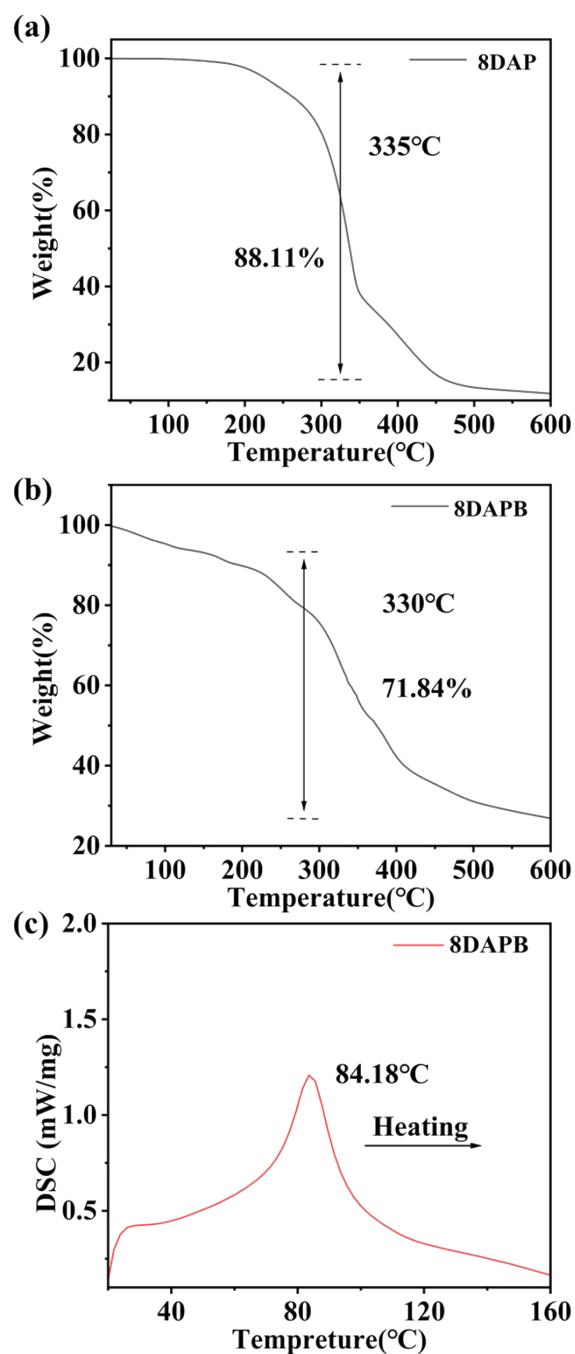

**Figure S4. Thermal properties of 8DAPB & 8DAP.** (a) Thermogravimetric analysis (TGA) of 8DAP. (b) Thermogravimetric analysis (TGA) of 8DAPB. (c) Differential scanning calorimetry (DSC) traces of 8DAPB. The experiment was conducted with heating and rates of 10 °C/min under N<sup>2</sup> atmosphere.

Thermogravimetric analysis (TGA) and differential scanning calorimetry (DSC) were used to determine the thermal properties of 8DAP and 8DAPB. The TGA of the 8DAPB shows a 75% weight loss at 330°C, the TGA of the 8DAP shows as 88% weight loss at 335°C, the decomposition rapidly accelerated above this temperature (Fig. S4(a) or (b)). The DSC heating

trace of 8DAPB shows a weak endothermic transition at 84.11°C (Fig. S4(c)), which was associated with the glass transition of the compound.



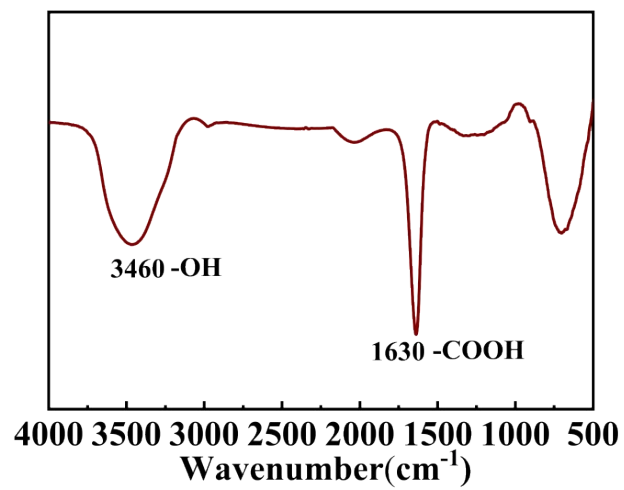

**Figure S5.** FTIR spectra of CdSe/ZnS QDs.

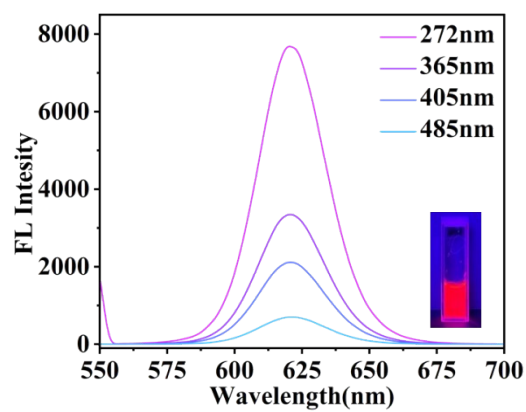

**Figure S6.** Emission spectra of CdSe/ZnS QDs with excitation at different wavelengths.

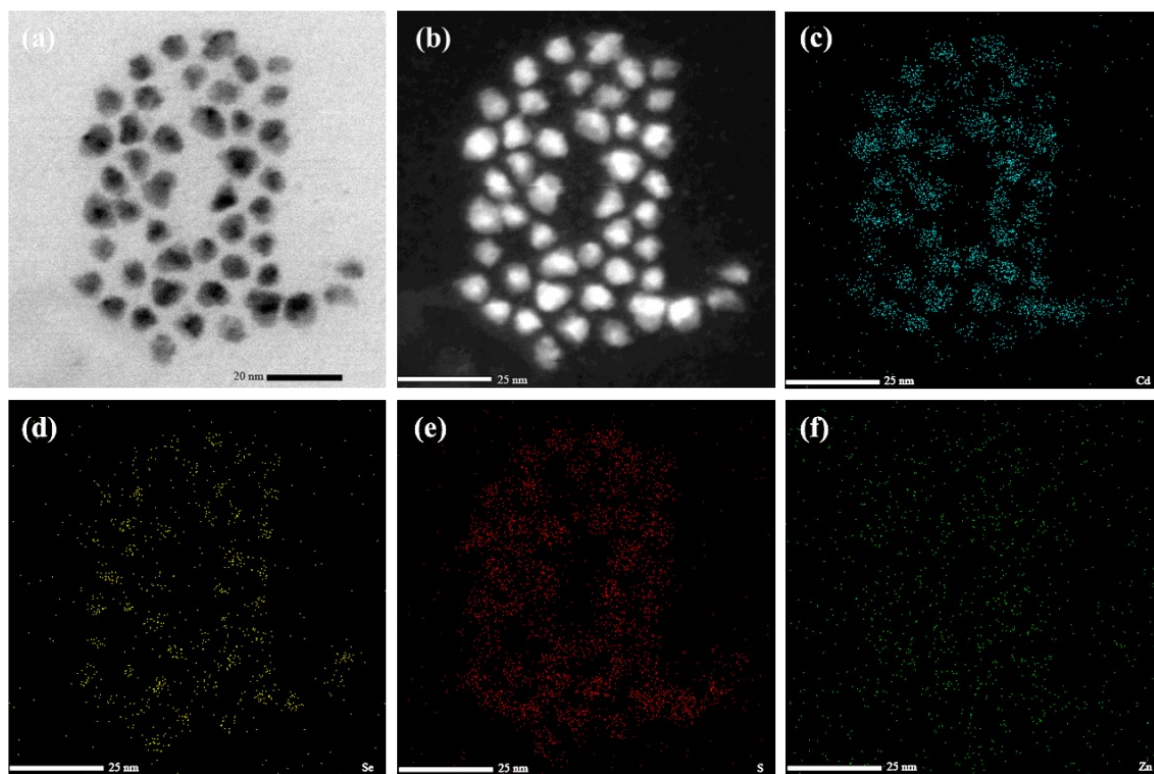

**Figure S7. Characterisation of the QDs.** (a)STEM image of the QDs. (c–f) STEM image of the elements contained in CdSe/ZnS QDs; (c)Cd cyan; (d)Se yellow; (e)S red; (f)Zn green.

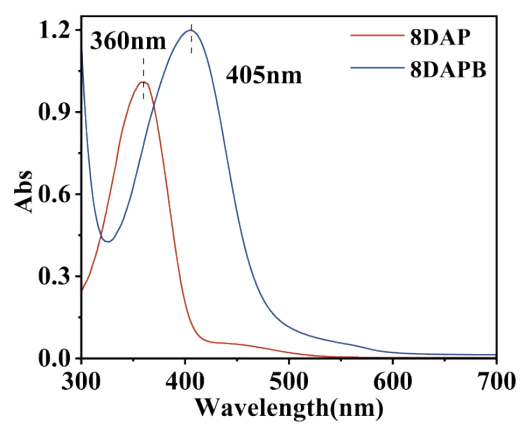

**Figure S8.** UV-vis absorption spectra of 8DAP and 8DAPB in Ethyl alcohol.

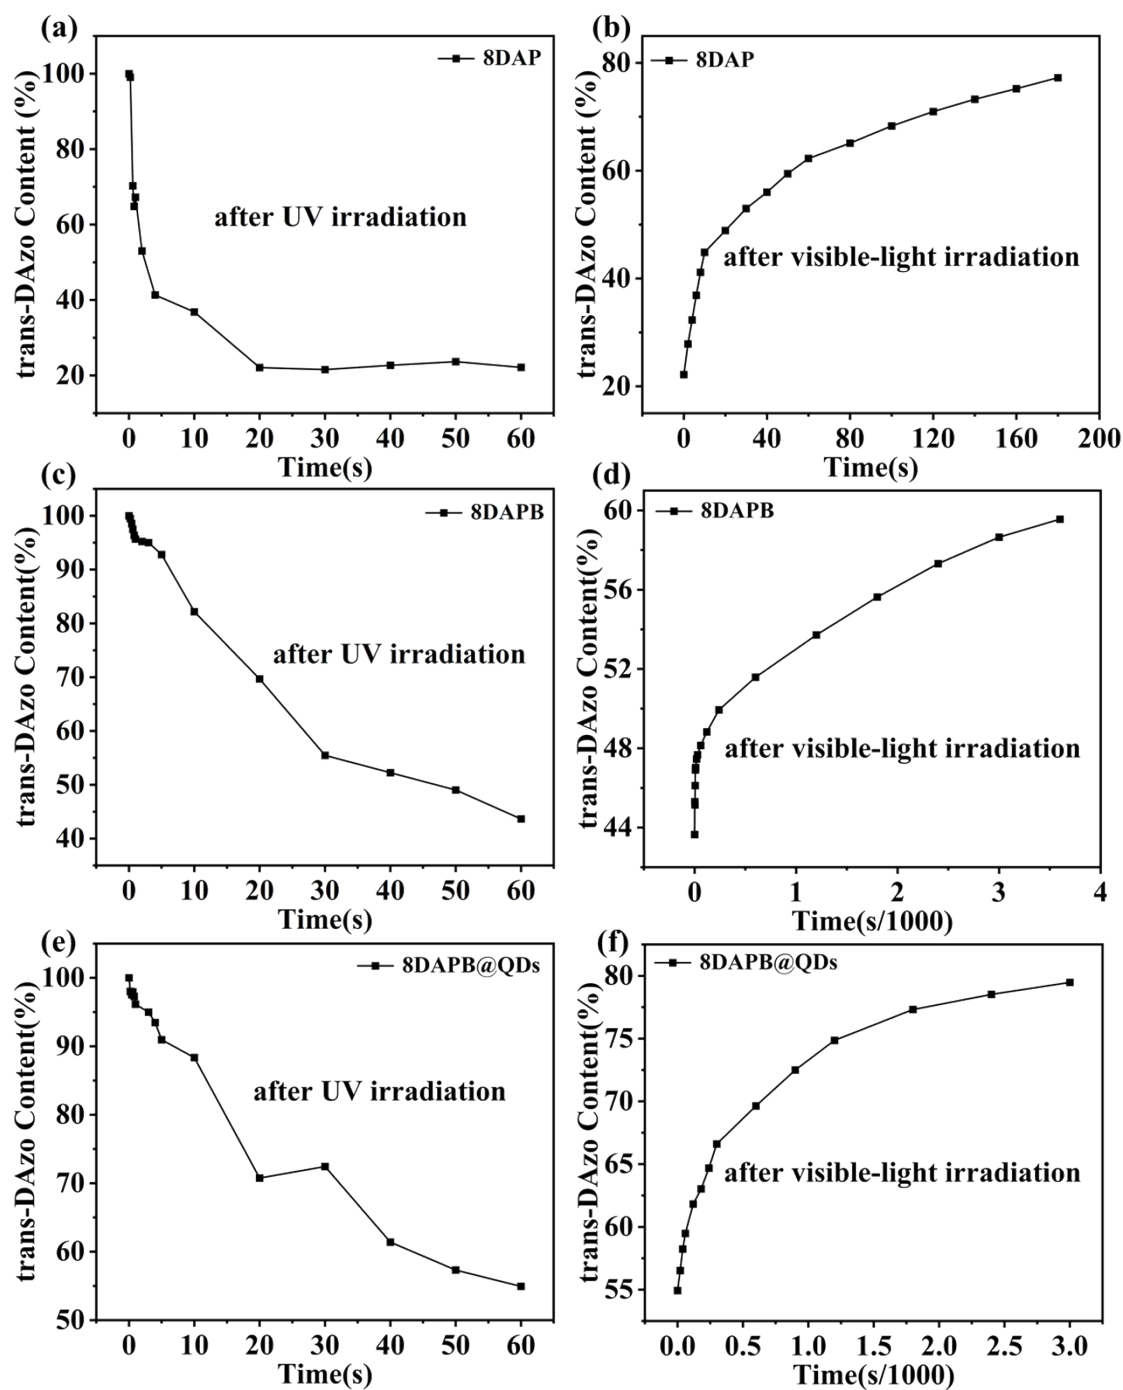

**Figure S9.** The plots of trans-DAzo content versus time of the 8DAP/8DAPB dissolved in Ethyl alcohol, (a,c) after UV irradiation; (b,d) after visible-light irradiation; the plots of trans-DAzo content versus time of the 8DAPB@QDs dissolved in aqueous ethanol solution, (e) after UV irradiation; (f) after visible-light irradiation; The trans-DAzo content is defined as the ratio of absorption intensity over the pristine absorption intensity at 405 nm.

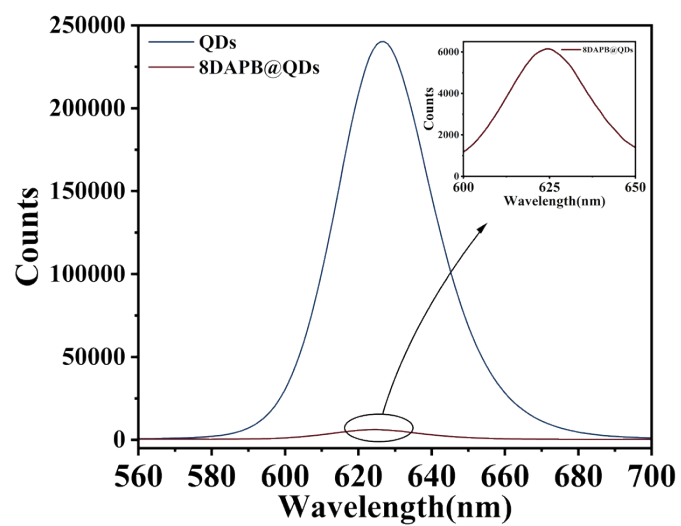

**Figure S10.** Fluorescence efficiency plots for the QDs and 8DAPB@QDs.

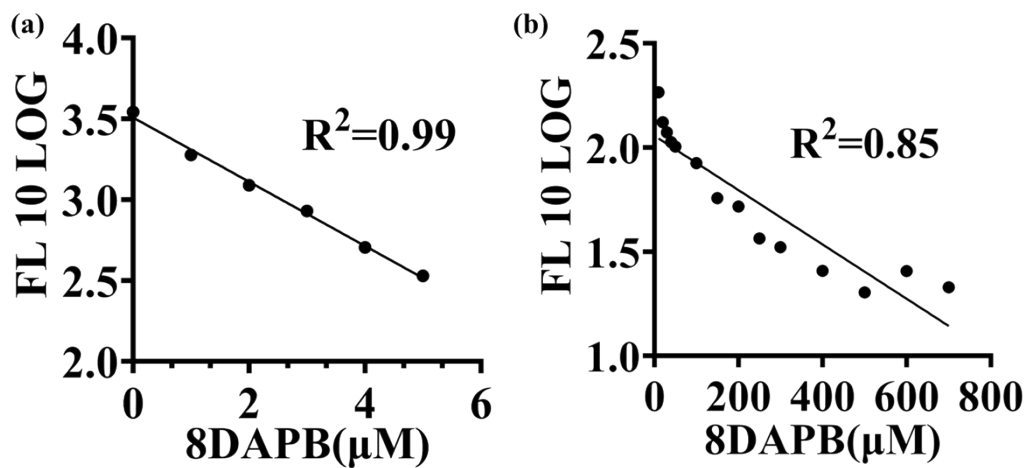

**Figure S11. Plots of the QDs quenched by various amounts of 8DAPB in ethanol/water mixtures (65% v/v); (a) The concentrations of 8DAPB were (μM): 0,1, 2, 3, 4, 5; (b) The concentrations of 8DAPB were (μM): 6,10,100,750.**

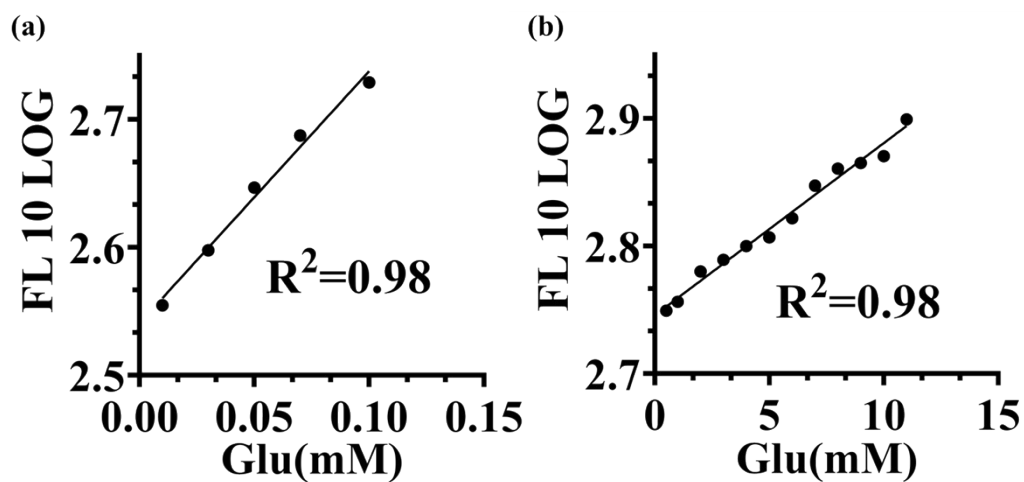

**Figure S12.** Plots of the 8DAPB@QDs recovery by various amounts of glucose in ethanol/water mixtures (65% v/v); (a) The concentrations of glucose were (mM): 0.01, 0.03, 0.05, 0.07, 0.1; (b) The concentrations of glucose were (mM): 0.5, 1, 2...11.



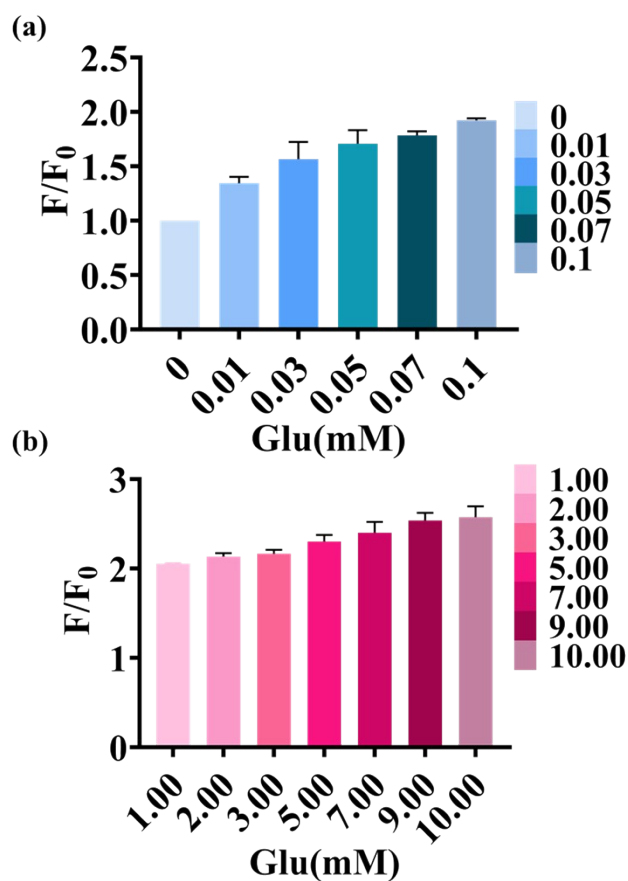

**Figure S13. ANOVA plot of relative fluorescence recovery ( $F/F_0$ ) of 8DAPB@QDs at different glucose concentrations.** (a) The concentrations of glucose were (mM): 0.01, 0.03, 0.05, 0.07, 0.1; (b) The concentrations of glucose were (mM): 1, 2...10.

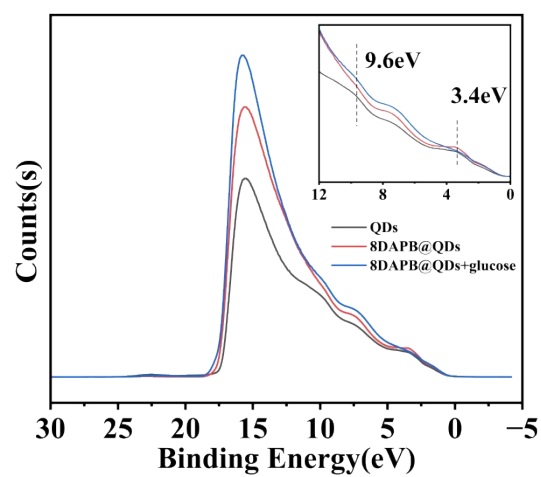

**Figure S14.** Ultraviolet photoelectron spectroscopy of QDs alone, 8DAPB@QDs, and 8DAPB@QDs +glucose, respectively.

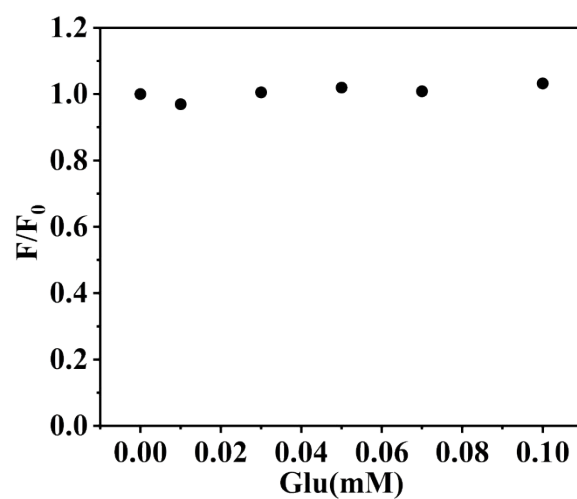

**Figure S15.** Effect of different concentrations of glucose on the FL( $F/F_0$ ) of QDs without 8DAPB. The concentrations of glucose were 0.01, 0.03, 0.05, 0.07, 0.1, mM.

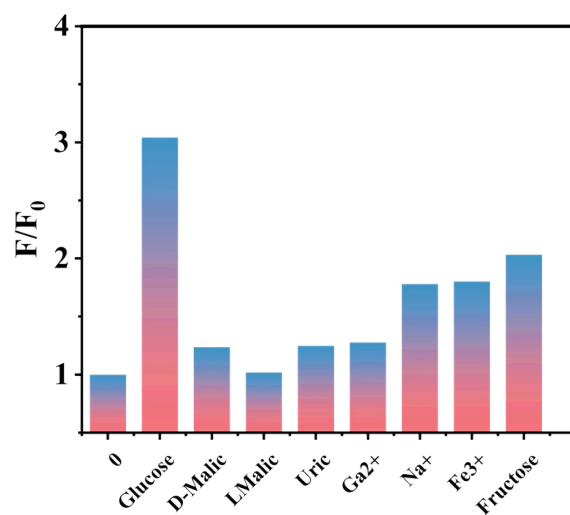

**Figure S16.** Effect of common species (e.g., Glucose, D-Malic acid, L-Malic acid, Uric acid, Ga<sup>2+</sup>, Na<sup>+</sup>, Fe<sup>3+</sup>, Fructose) on the Fluorescence Intensity ( $F/F_0$ ) of 8DAPB@QDs.

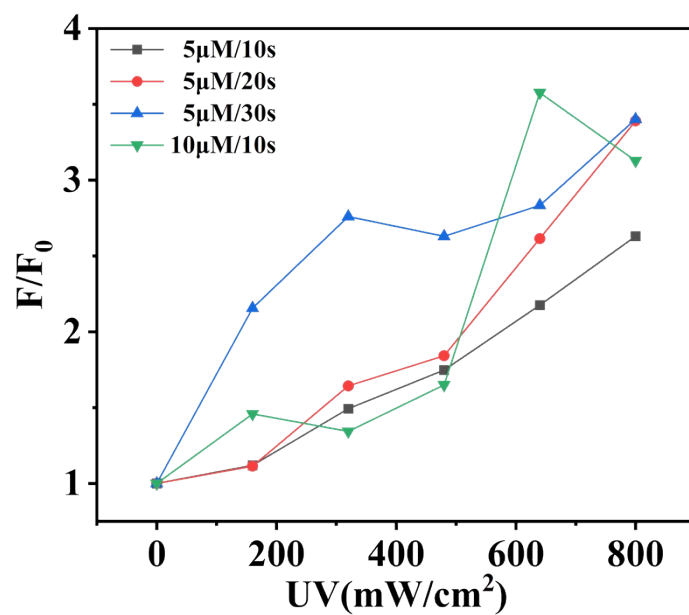

**Figure S17.** UV response curves obtained from the 8DAPB@QDs (5,10  $\mu\text{m}$ ) system under different UV irradiation durations.

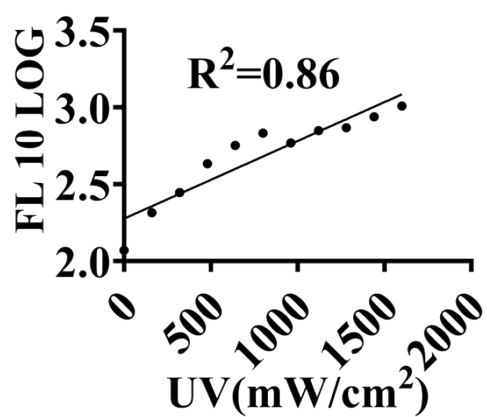

**Figure S18.** Plots of the 8DAPB@QDs recovery by various irradiance of UV in ethanol/water mixtures (65% v/v), The irradiance of UV were 160, 320, 480... 1600, mW/cm<sup>2</sup>.

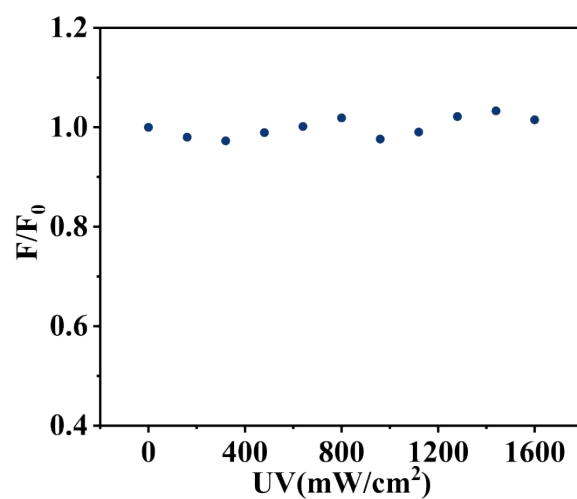

**Figure S19.** Effect of different irradiance of UV on the FL( $F/F_0$ ) of QDs without 8DAPB. The irradiance of UV were 160, 320, 480... 1600, mW/cm<sup>2</sup>.

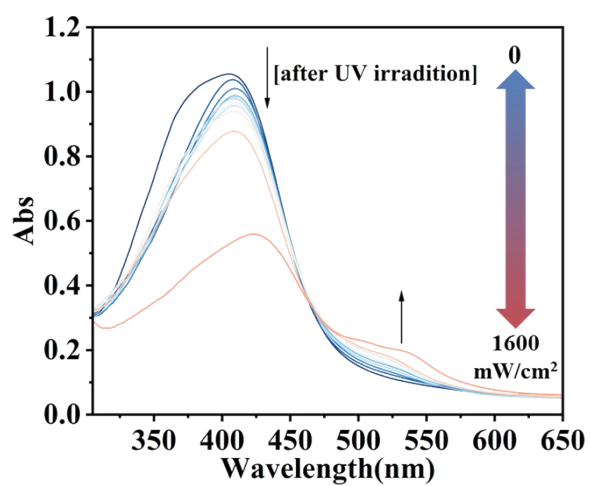

**Figure S20.** Changes in the absorption spectrum of 8DAPB upon irradiation with 365 nm light in Ethyl alcohol, The irradiance of UV were 160, 320, 480... 1600, mW/cm<sup>2</sup>.



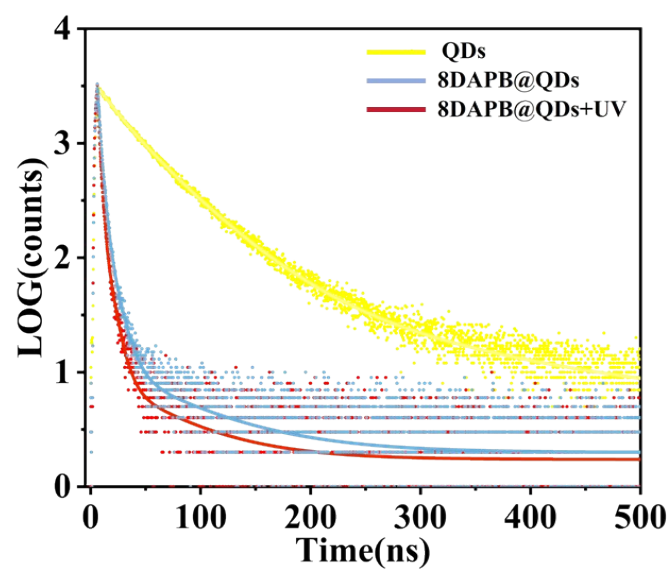

**Figure S21.** Time-resolved fluorescence decay curves for the pure QDs, 8DAPB@QDs, and UV-treated 8DAPB@QDs.

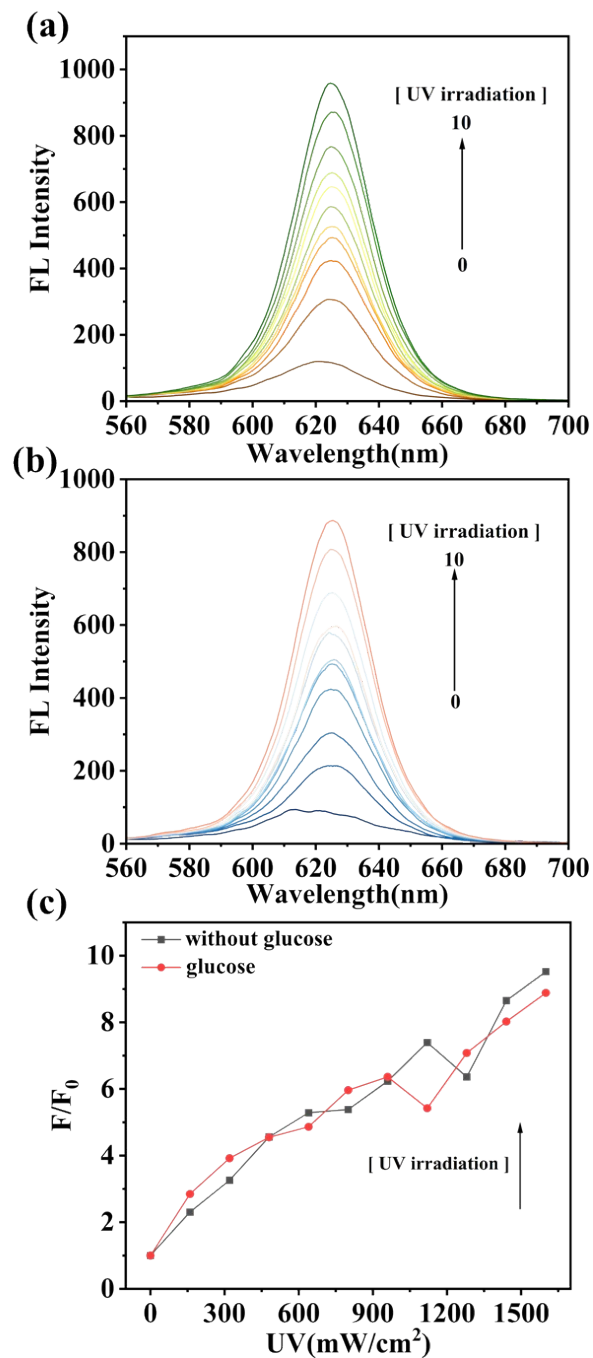

**Figure S22** (a) FL spectra and curves of 8DAPB@QDs with glucose (100 μM) recovery by various irradiance of UV in ethanol/water mixtures (65% v/v); (b) FL spectra and curves of 8DAPB@QDs recovery by various irradiance of UV in ethanol/water mixtures (65% v/v); (c) Fitting curve of the relative intensity of FL ( $F/F_0$ ) vs UV irradiance, The irradiance of UV were 160, 320, 480... 1600, mW/cm<sup>2</sup>.

**Table S1.** Fluorescence quantum yield of QD and 8DAPB@QDs.

| Sample    | Fluorescence quantum<br>yield |
|-----------|-------------------------------|
| QDs       | 84.87%                        |
| 8DAPB@QDs | 3.54%                         |

**Table S2** Fluorescence lifetimes obtained with three-exponential fit of the fluorescence decay curves of the QDs alone, 8DAPB@QDs, and 8DAPB@QDs+glucose, respectively.

| <b>Sample</b>     | <b><math>\tau_1</math> /ns</b> | <b><math>\tau_2</math> /ns</b> |
|-------------------|--------------------------------|--------------------------------|
| QDs               | 25.84                          | 64.55                          |
| 8DAPB@QDs         | 16.48                          | 44.33                          |
| 8DAPB@QDs+glucose | 18.02                          | 47.39                          |

**Formula S1** Standard deviation

$$RSD = \frac{SD}{x(average)} \times 100\%$$
